# Supplementary material
Source: Springer Nature journal article supplement (https://www.springermedizin.de/resource/supplementary/12879_2013_3627_MOESM1_ESM.pdf/9446282)
Supplement: MOESM1 [file 9446282]

### Supplementary Material: Multidimensional Poverty Index

| Question                                                                                                                                                                  | Answer                                                                                                                                                       | How to Score                                                                                                                   | Points |
|---------------------------------------------------------------------------------------------------------------------------------------------------------------------------|--------------------------------------------------------------------------------------------------------------------------------------------------------------|--------------------------------------------------------------------------------------------------------------------------------|--------|
| 1. Of all of the people in your household, has any one person attended school for more than 5 years of his or her life?                                                   | 0 – No<br>1 – Yes                                                                                                                                            | 1 point for Yes                                                                                                                |        |
| 2. How many children between the ages of 5 and 14 are living in your household?<br>How many of these children are currently attending school?                             | _____ children<br>_____ attending school                                                                                                                     | 1 point if all children attend school.<br>Otherwise 0 points.                                                                  |        |
| 3. Have any children in your household died?                                                                                                                              | 0 – Yes<br>1 – No                                                                                                                                            | 1 point for No                                                                                                                 |        |
| 4. Is any person in your household too thin (malnourished) because there is not enough food to eat?                                                                       | 0 – Yes<br>1 – No                                                                                                                                            | 1 point for No                                                                                                                 |        |
| 5. Does your household have electricity, either from Tanesco or from a generator?                                                                                         | 0 – No<br>1 – Yes                                                                                                                                            | 1/3 point for Yes                                                                                                              |        |
| 6. Does your household have access to safe, clean drinking water? How many minutes does it take you to collect clean water?                                               | 0 – No<br>1 – Yes and it takes less than 30 minutes<br>2 – Yes but it takes longer than 30 minutes                                                           | 1/3 point for “Yes and it takes less than 30 minutes”<br>Otherwise 0 points.                                                   |        |
| 7. How many households share the toilet or latrine that you use?                                                                                                          | ___ households                                                                                                                                               | 1/3 point for 1-4 households. 0 points if $\geq 5$ households.                                                                 |        |
| 8. Is the floor of your home made from dirt or sand or dung?                                                                                                              | 0 – Yes<br>1 – No                                                                                                                                            | 1/3 point for No                                                                                                               |        |
| 9. What do you use to cook most of the food that you eat at home?                                                                                                         | 0 – Wood, coal, or dung<br>1 – Other                                                                                                                         | 1/3 point for Other                                                                                                            |        |
| 10. Does your household have the following things:<br>a. Radio<br>b. Television<br>c. Telephone<br>d. Bicycle<br>e. Motorcycle<br>f. Refrigerator<br>g. Car<br>h. Tractor | 0 – No / 1 – Yes<br>0 – No / 1 – Yes | 0 points if the household has zero or one of the things listed in “a” – “f” and no car or tractor.<br><br>Otherwise 1/3 point. |        |
|                                                                                                                                                                           |                                                                                                                                                              | <b>TOTAL POINTS</b>                                                                                                            |        |

Maximum possible score = 6 points. A score of  $\leq 4$  points represents multidimensional poverty.
